# Supplementary material for: Unraveling the superior anchoring of lithium polyselenides to the confinement bilayer C2N: an efficient host material for lithium–selenium batteries
Source: Royal Society of Chemistry journal article supplement (doi:10.1039/d1cp03218f), 2021-01-01
Supplement: d1cp03218f1.pdf [file d1cp03218f1.pdf]

## **Supporting Information**

for

### **Unraveling the superior anchoring of lithium polyselenides to the confinement bilayer C<sub>2</sub>N: an efficient host material for lithium-selenium batteries**

Shuwei Tang,<sup>\*a</sup> Chenchen Liu,<sup>a</sup> Wen Sun,<sup>a</sup> Jingyi Zhang,<sup>a</sup> Shulin Bai,<sup>a</sup> Xu Zhang,<sup>a</sup> and  
Shaobin Yang<sup>a</sup>

<sup>a</sup> College of Materials Science and Engineering, Liaoning Technical University, Fuxin,  
Liaoning 123000, China

Corresponding author:

E-mail: tangsw911@nenu.edu.cn

Table S1. The adsorbed structures and binding energies ( $E_b$ ) for  $\text{Se}_8$  and LiPSes at different lithiation stages on the surface of AA-stacking  $\text{C}_2\text{N}$  at different sites.

| structure                |                                                                                                      |                                                                                                      |                                                                                                       |                                                                                                        |                                                                                                        |                                                                                                      |
|--------------------------|------------------------------------------------------------------------------------------------------|------------------------------------------------------------------------------------------------------|-------------------------------------------------------------------------------------------------------|--------------------------------------------------------------------------------------------------------|--------------------------------------------------------------------------------------------------------|------------------------------------------------------------------------------------------------------|
| $E_b$                    |                                                                                                      |                                                                                                      |                                                                                                       |                                                                                                        |                                                                                                        |                                                                                                      |
| $\text{Li}_2\text{Se}$   | 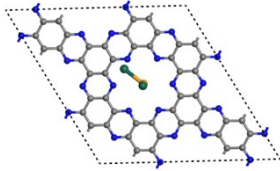<br>$E_b=3.62$ eV   | <br>$E_b=2.74$ eV   | <br>$E_b=2.45$ eV   | <br>$E_b=2.16$ eV   | <br>$E_b=2.04$ eV   | <br>$E_b=1.56$ eV |
| $\text{Li}_2\text{Se}_2$ | <br>$E_b=3.03$ eV   | <br>$E_b=2.09$ eV   | <br>$E_b=1.95$ eV   | <br>$E_b=1.75$ eV   | <br>$E_b=1.34$ eV   | <br>$E_b=1.23$ eV |
| $\text{Li}_2\text{Se}_4$ | <br>$E_b=3.01$ eV | <br>$E_b=1.58$ eV | <br>$E_b=1.56$ eV | <br>$E_b=1.39$ eV | <br>$E_b=1.31$ eV |                                                                                                      |

|                                 |                                                                                    |                                                                                    |                                                                                     |                                                                                      |                                                                                     |
|---------------------------------|------------------------------------------------------------------------------------|------------------------------------------------------------------------------------|-------------------------------------------------------------------------------------|--------------------------------------------------------------------------------------|-------------------------------------------------------------------------------------|
| Li <sub>2</sub> Se <sub>6</sub> | 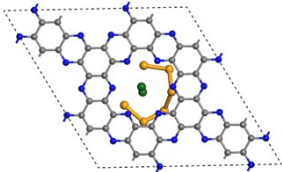  |   |   |   |  |
|                                 | $E_b=2.98$ eV                                                                      | $E_b=2.14$ eV                                                                      | $E_b=1.80$ eV                                                                       | $E_b=1.80$ eV                                                                        | $E_b=1.73$ eV                                                                       |
| Li <sub>2</sub> Se <sub>8</sub> |   |   |   |   |                                                                                     |
|                                 | $E_b=2.78$ eV                                                                      | $E_b=2.23$ eV                                                                      | $E_b=1.87$ eV                                                                       | $E_b=1.83$ eV                                                                        |                                                                                     |
| Se <sub>8</sub>                 |  |  |  |  |                                                                                     |
|                                 | $E_b=2.01$ eV                                                                      | $E_b=1.99$ eV                                                                      | $E_b=1.76$ eV                                                                       | $E_b=0.96$ eV                                                                        |                                                                                     |

Table S2. The adsorbed structures and binding energies ( $E_b$ ) for  $\text{Se}_8$  and LiPSes at different lithiation stages on the surface of AB-stacking  $\text{C}_2\text{N}$  at different sites.

| structure                |                                                                                                      |                                                                                                      |                                                                                                       |                                                                                                        |                                                                                                        |                                                                                                      |
|--------------------------|------------------------------------------------------------------------------------------------------|------------------------------------------------------------------------------------------------------|-------------------------------------------------------------------------------------------------------|--------------------------------------------------------------------------------------------------------|--------------------------------------------------------------------------------------------------------|------------------------------------------------------------------------------------------------------|
| $E_b$                    |                                                                                                      |                                                                                                      |                                                                                                       |                                                                                                        |                                                                                                        |                                                                                                      |
| $\text{Li}_2\text{Se}$   | 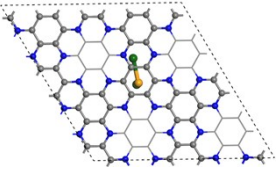<br>$E_b=2.63$ eV   | <br>$E_b=1.47$ eV   | <br>$E_b=1.36$ eV   | <br>$E_b=1.25$ eV   | <br>$E_b=1.19$ eV   |                                                                                                      |
| $\text{Li}_2\text{Se}_2$ | <br>$E_b=2.36$ eV   | <br>$E_b=1.78$ eV   | <br>$E_b=1.49$ eV   | <br>$E_b=1.34$ eV   | <br>$E_b=0.64$ eV   | <br>$E_b=0.47$ eV |
| $\text{Li}_2\text{Se}_4$ | <br>$E_b=1.79$ eV | <br>$E_b=1.52$ eV | <br>$E_b=1.26$ eV | <br>$E_b=1.18$ eV | <br>$E_b=1.16$ eV |                                                                                                      |

|                          |                                                                                                            |                                                                                                            |                                                                                                             |                                                                                                              |                                                                                                              |                                                                                                              |
|--------------------------|------------------------------------------------------------------------------------------------------------|------------------------------------------------------------------------------------------------------------|-------------------------------------------------------------------------------------------------------------|--------------------------------------------------------------------------------------------------------------|--------------------------------------------------------------------------------------------------------------|--------------------------------------------------------------------------------------------------------------|
| $\text{Li}_2\text{Se}_6$ | 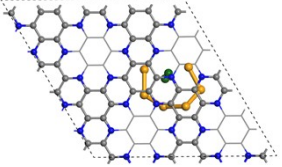<br>$E_b=1.69 \text{ eV}$ | <br>$E_b=1.30 \text{ eV}$ | <br>$E_b=1.02 \text{ eV}$ | <br>$E_b=0.98 \text{ eV}$ | <br>$E_b=0.91 \text{ eV}$ | <br>$E_b=0.83 \text{ eV}$ |
| $\text{Li}_2\text{Se}_8$ | <br>$E_b=1.86 \text{ eV}$ | <br>$E_b=1.51 \text{ eV}$ | <br>$E_b=1.45 \text{ eV}$ | <br>$E_b=1.30 \text{ eV}$ | <br>$E_b=1.18 \text{ eV}$ |                                                                                                              |
| $\text{Se}_8$            | <br>$E_b=1.19 \text{ eV}$ | <br>$E_b=1.13 \text{ eV}$ | <br>$E_b=0.99 \text{ eV}$ | <br>$E_b=0.89 \text{ eV}$ | <br>$E_b=0.77 \text{ eV}$ |                                                                                                              |
